# Supplementary material for: Cancer cachexia associates with a systemic autophagy-inducing activity mimicked by cancer cell-derived IL-6 trans-signaling
Source: PubMed Central journal article supplement (PMC5435723; doi:10.1038/s41598-017-02088-2), 2017-05-17
Supplement: 41598_2017_2088_MOESM1_ESM.pdf [file 41598_2017_2088_MOESM1_ESM.pdf]

## **Supplementary materials**

### **Cancer cachexia associates with a systemic autophagy-inducing activity mimicked by cancer cell-derived IL-6 trans-signaling**

Kristine Pettersen, Sonja Andersen, Simone Degen, Valentina Tadini, Joël Grosjean, Shinji Hatakeyama, Almaz N. Tesfahun, Siver Moestue, Jana Kim, Unni Nonstad, Pål R. Romundstad, Frank Skorpen, Sveinung Sørhaug, Tore Amundsen, Bjørn H. Grønberg, Florian Strasser, Nathan Stephens, Dag Hoem, Anders Molven, Stein Kaasa, Kenneth Fearon, Carsten Jacobi, Geir Bjørkøy

## SUPPLEMENTAL MATERIALS AND METHODS

### Cell culture conditions and reagents

Cells were maintained in a humidified atmosphere of 5% CO<sub>2</sub>; 95% air at 37°C. TOV21G cells from ATCC (CRL-11730) were cultured in 42.5% Medium 199+GlutamaxTMI (Gibco 41150) and 42.5% medium MCDB 105 (Sigma M6395, dissolved in dH<sub>2</sub>O to 1L final volume, added NaHCO<sub>3</sub> (1.5 g/L) and adjusted to pH 7.3), supplemented with Fetal Bovine Serum (FBS, 15%.) and gentamicin (0.05 mg/ml). HEK293 GFP, GFP-p62 and GFP-p62<sup>L341A</sup> flip-in cells (a kind gift from Prof. T. Johansen) and HeLaS3 cells (a kind gift from Prof. Marit Otterlei) were cultured in DMEM (Sigma D5796) supplemented with FBS (10%) and gentamicin (0.05 mg/ml). SW620 cells from ATCC (CCL-227) were cultured in Leibovitz's L-15 medium (BioWhittaker 12-700-F), supplemented with L-glutamine (2 mM), FBS (10%) and gentamicin (0.05 mg/ml). Caco-2 and A427 cells from ATCC (HTB-37 and HBT-53, respectively) were cultured in Eagle medium (Sigma, M5650) supplemented with L-glutamine (2 mM), Sodium pyruvate (NaP; 1%), gentamicin (0.05 mg/ml), and FBS (20% and 10%, respectively). A549 cells from ATCC (CCL-185) were cultured in DMEM/F-12 medium (Sigma D8437) supplemented with FBS (10%) and gentamicin (0.05 mg/ml). A-172 from ATCC (CRL-1620) were cultured in DMEM (Sigma D6429) supplemented with NaP (1%), gentamicin (0.05 mg/ml), and FBS (10%). U2OS cells from ATCC (HTB-96) were cultured in RPMI 1640 (Sigma R8758) supplemented with L-glutamine (0.6 mM), gentamicin (0.02 mg/ml), and FBS (10%). A2058 from ATCC (CRL-11147) were cultured in DMEM and Glutamax media (Invitrogen, 31966) supplemented with FBS (10%), NaHCO<sub>3</sub> (1.5 g/l, Invitrogen) and Pen/Strep/Fungizone (PSF, 1%; PAA#P11-002). MeWo cells from ATCC (HTB-65) were cultured in MEM (Invitrogen, 31095029) supplemented with FBS (10%), non-essential amino acids (NEAS, 1x, Gibco #11140), NaP (1 mM), NaHCO<sub>3</sub>

(1.5 g/l, Invitrogen) and PSF (1%). G361 cells from ATCC (CRL-1424) were cultured in McCoy's medium (Invitrogen, 26600) supplemented with FBS (10%) and PSF (1%). MKN-1 cells from RIKEN (RCB1003) were cultured in RPMI-1640 (Sigma, R7638) supplemented with FBS (10%) and PSF (1%). B9 cells (a kind gift from Drs. L. A. Aarden and M. Helle) were cultured in RPMI (Sigma R8758) supplemented with FBS (heat inactivated, 10%) and IL-6 (about 1 ng/ml) isolated from peripheral blood leukocytes (PBL) according to the following procedure: PBL are washed twice in Hanks Balanced Salt Solution (HBSS) and resuspended in RPMI (Sigma R8758) supplemented with FBS (heat inactivated, 5%) and LPS (0.1 µg/ml). Cells are incubated for 24 hours before the supernatant is harvested and frozen at -20°C. IL-6 is tested against previous harvested IL-6. Exact IL-6 concentration will vary from batch to batch. C2C12 myocytes from ATCC (CRL-1772) were cultured in DMEM (Sigma D5769), supplemented with NaP (0.11g/L), FBS (10%,) and gentamicin (0.05 mg/ml). When differentiating C2C12 cell into myotubes, myoblasts were seeded in conventional medium. Once the culture reached 80-90% confluency (two days) medium was exchanged to (Sigma D5769), supplemented with NaP (0.11g/L), Horse Serum (2%,) and gentamicin (0.05 mg/ml). Following five days, myotubes had formed and experiments were initiated.

Serum-free media used to make conditioned media were as follows: A-2058: phenol-red free DMEM (Invitrogen #11880), PSF (1%) and NaHCO<sub>3</sub> (1.5 g/L), MeWo: phenol-red free MEM (Invitrogen #51200046), NEAS (1x), NaP (1 mM) and NaHCO<sub>3</sub> (1.5 g/L), G-361: as full medium without FCS, MKN-1: phenol-red free RPMI (Sigma R7509) with PSF (1%).

rIL-6 (Invitrogen, cat.no. PHC0066), rIL-8 (Gibco, cat.no. PHC0084), rVEGF (R&D systems, cat.no. 293-VE), Tocilizumab/RoACTEMRA (a humanized monoclonal antibody against the interleukin-6 receptor, Roche) IL-6-specific ab (R&D systems, Cat.no. AF-206-NA), Hanks

balanced salt solution (HBSS, Gibco), recombinant IL-6 receptor alpha (R&D systems, cat.no. 227-SR-025), Recombinant Human gp130 Fc Chimera Protein, CF (spg130Fc, R&D systems, cat.no. 671-GP-100 or a kind gift from Prof. J. Scheller <sup>1</sup>), and conditioned medium from hyper IL-6-producing Chinese hamster ovary (CHO) cells (a kind gift from Prof. J. Scheller <sup>2</sup>) were used as specified.

### **IL-6 bioassay**

B9 cells were seeded in 96-well plates (5000 cells/well) in RPMI (Sigma R8758) supplemented with FBS (heat inactivated, 5%) and CM from TOV21G cells (1:2) or a series of rIL-6 concentrations ranging from 0-64 pg/ml (Standard curve). Following 3 days, 5 mg/ml MTT (3-(4,5-dimethylthiazol-2-yl)-2,5-diphenyltetrazolium bromide) in PBS (20 µl/well) was added and the culture incubated for 4 hours at 37°C. Thereafter, 150 µl of the supernatant was removed and replaced with 100 µl 0.04 M HCl in isopropanol. The plate was shaken until formazan dissolved and optical density was measured using a microplate reader at 570 nm.

### **Antibodies**

Anti-SQSTM1 (Progen, Cat.no. GP62-C), anti-LC3B (D11, Cell Signaling Tech., Cat.no. 3868), anti-β-actin/ACTB and anti-β-tubulin/TUBB (Abcam, cat.no. ab6276 and ab6046, respectively), anti-phosphoAKT<sup>Ser473</sup> (Cell signaling, (D9E) XP, cat.no. 4060), anti-phosphoSTAT3<sup>Tyr705</sup> and anti-MAPK (Erk1/2) (Cell signaling, cat.no. 9145S and 9107 respectively), and anti-PCNA (Santa cruz biotechnology (PC10), cat.no. sc-56).

## SUPPLEMENTAL FIGURES AND TABLES

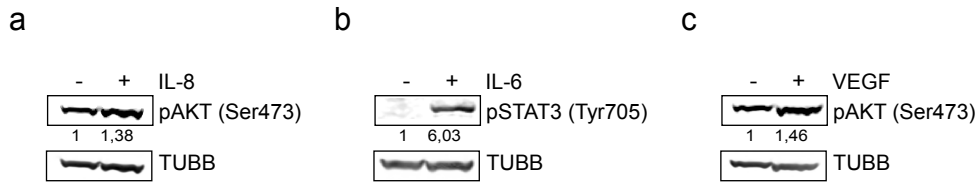

**Figure S1. Bioactivity of recombinant IL-8, IL-6 and VEGF.** A-C) Protein levels of pAKTSer473 and pSTAT3Tyr705 in HEK293 reporter cells treated for 5 minutes with rIL-8 (10 ng/ml), rIL-6 (20 ng/ml) and VEGF (2 ng/ml). Signal intensity of the phospho-protein band were normalized against  $\beta$ -tubulin/TUBB as indicated.

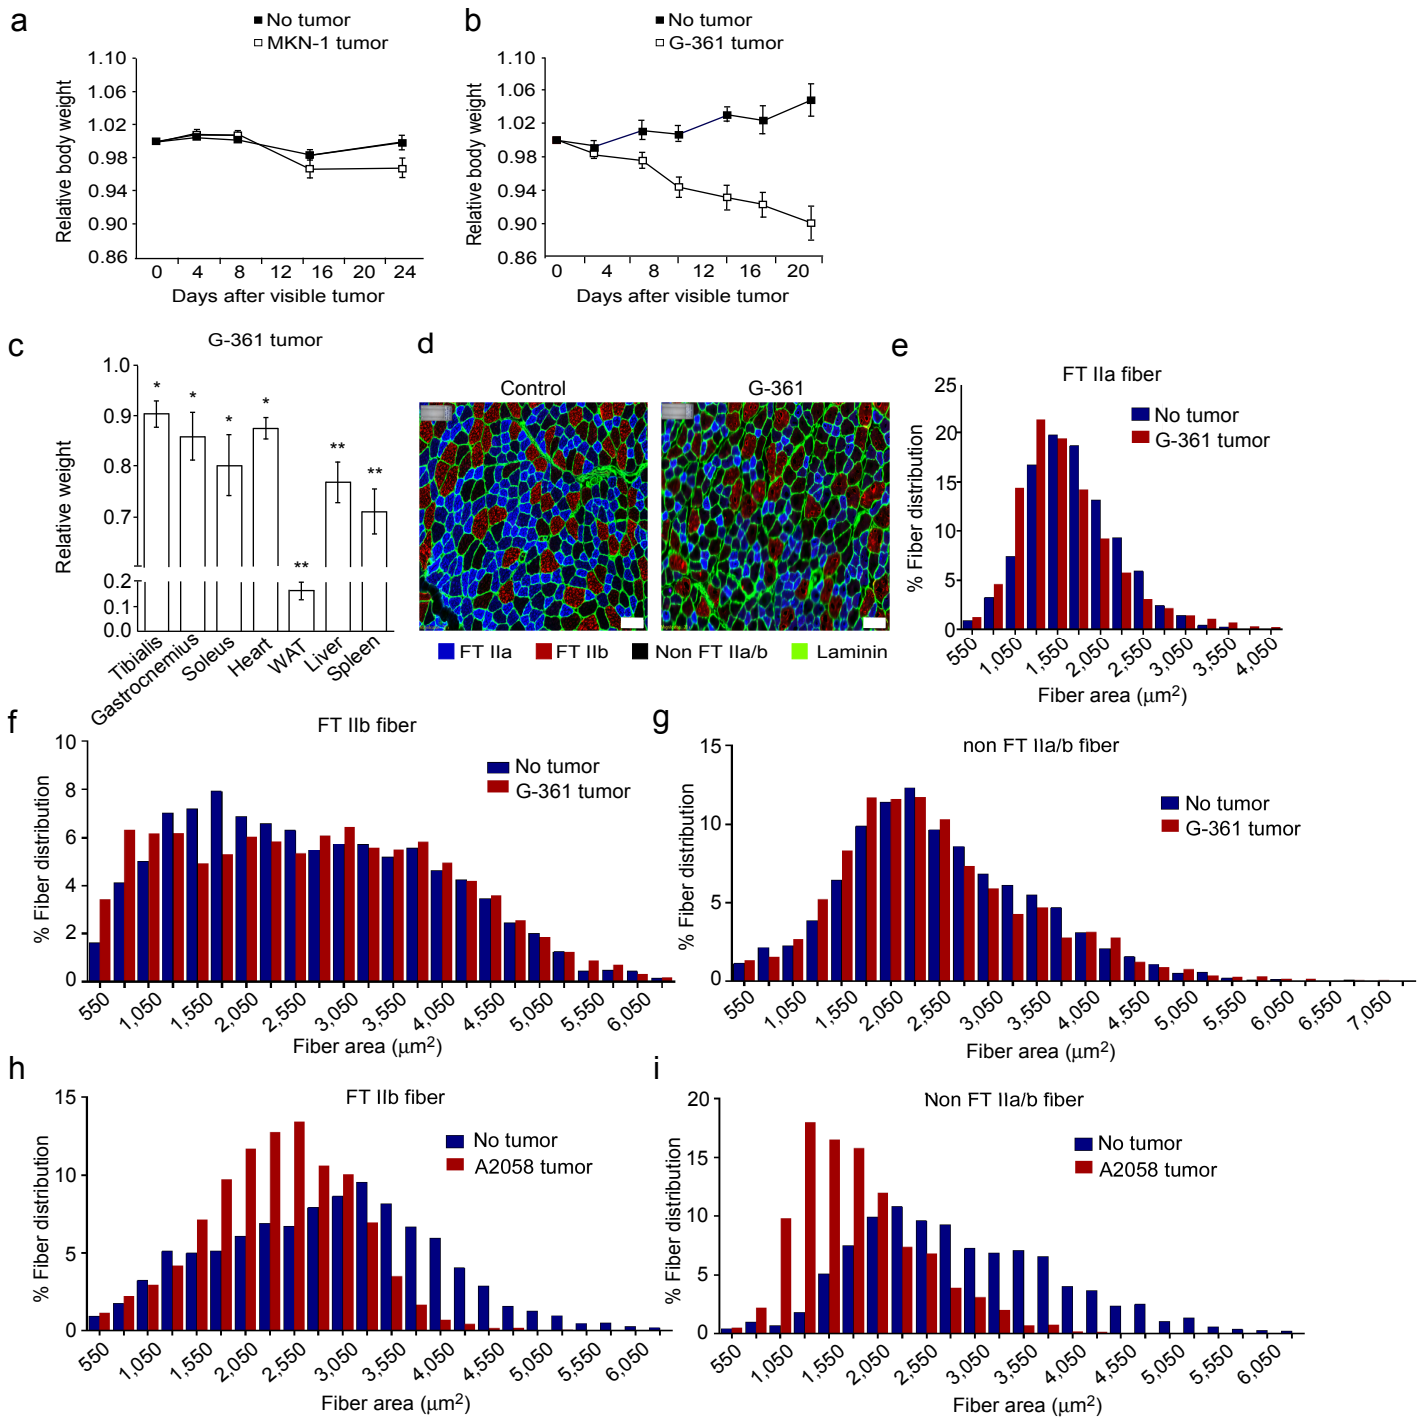

**Figure S2. Cachectic effects of autophagy-inducing and non-inducing cell lines** A-B) Mean relative body weight (at indicated time intervals)  $\pm$ SEM of MKN-1 (n=10) and G-361 (n=12) tumor-bearing mice and control mice (n=8), respectively. C) Mean relative muscle, white adipose tissue (WAT) and organ weight  $\pm$ SEM of G-361 (n=12) tumor-bearing mice in comparison to control mice (n=8). \* $p$ <0.05, \*\* $p$ <0.01 versus control (Student t-test). D) Cross section of tibialis muscle from control and G-361 tumor-bearing mice. Fast Twitch (FT) IIa, IIb muscle fibers and laminin are immunostained as indicated. Scale bar=100 $\mu$ m. E-G) Mean tibialis muscle Fast Twitch (FT) IIa, b and non FT fiber area in controls (n=5) and G-361 tumor-bearing mice (n=5). H-I) Mean tibialis muscle FT IIb and non FT fiber area in controls (n=3) and A2058 tumor-bearing mice (n=4).

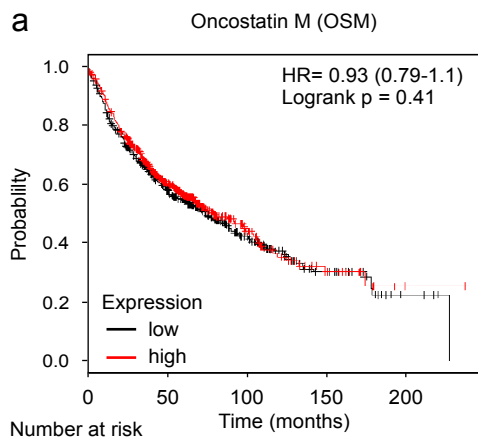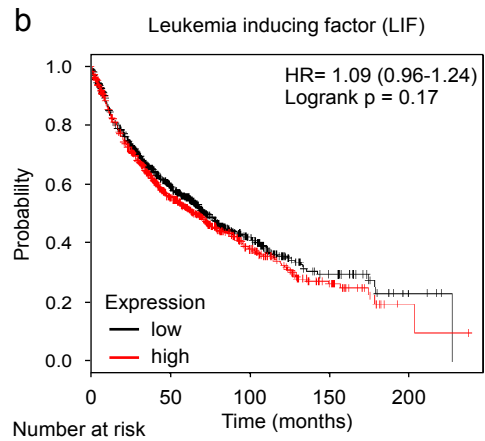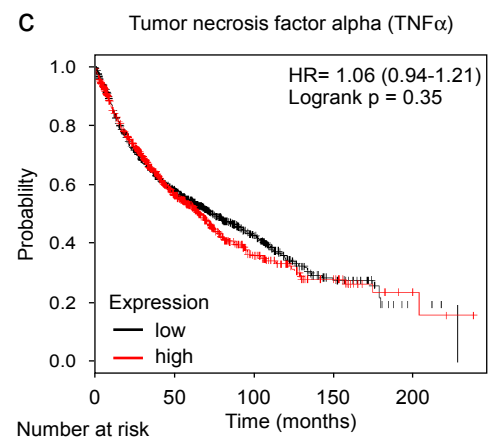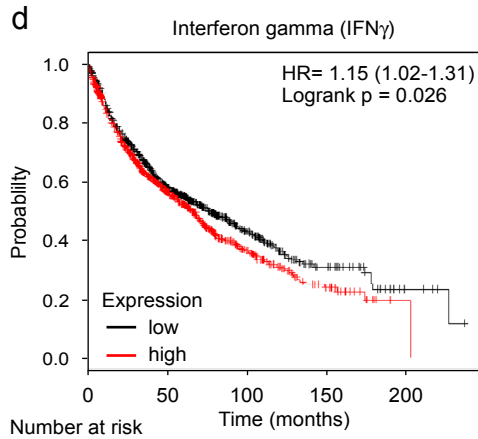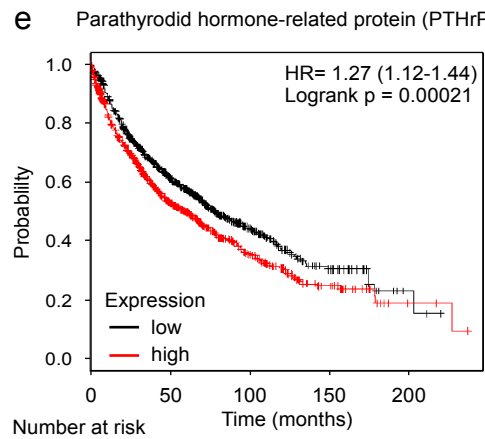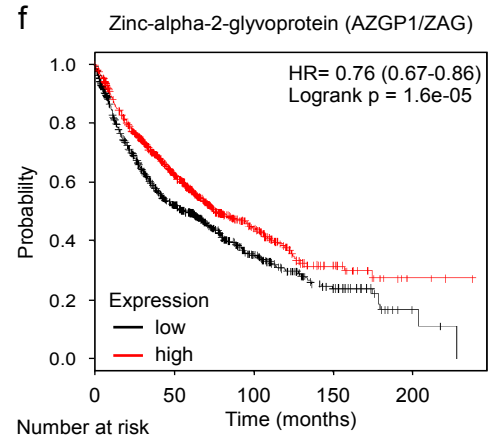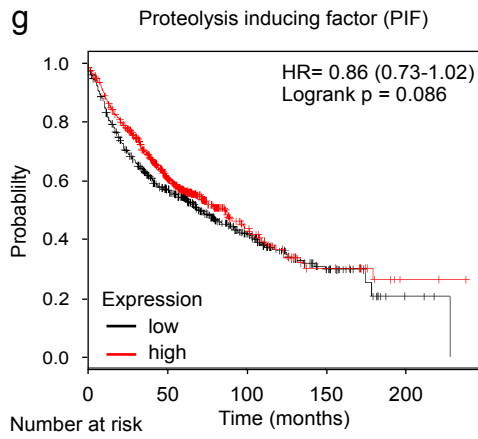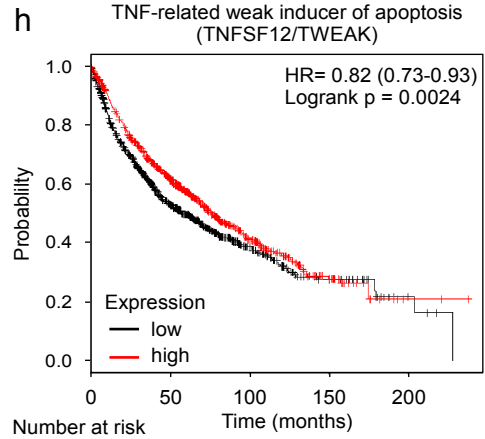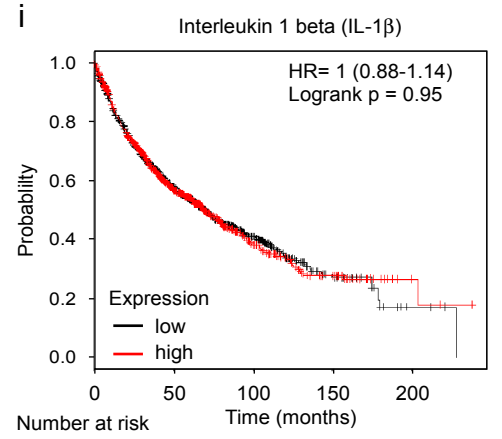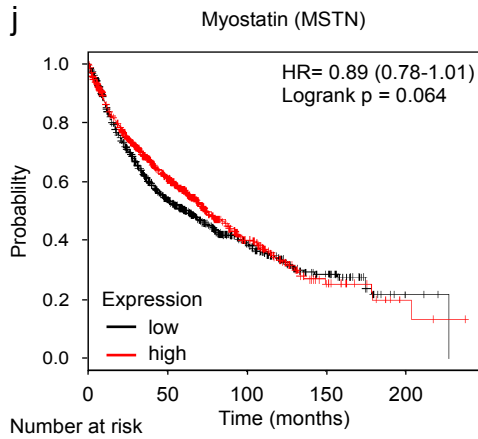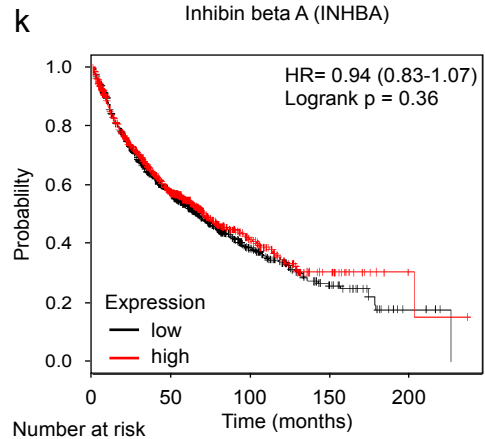

**Figure S3. Lack of clear prognostic value of expression level for proposed cachexia inducing signaling substances and survival of lung cancer patients. A-K)** Tumor expression of the indicated genes (split by mean mRNA level) predicts increased or decreased survival of lung cancer patients as indicated. HR=hazard ratio. The data are obtained using the [kmplot.com](http://kmplot.com) database tool<sup>3,4</sup>



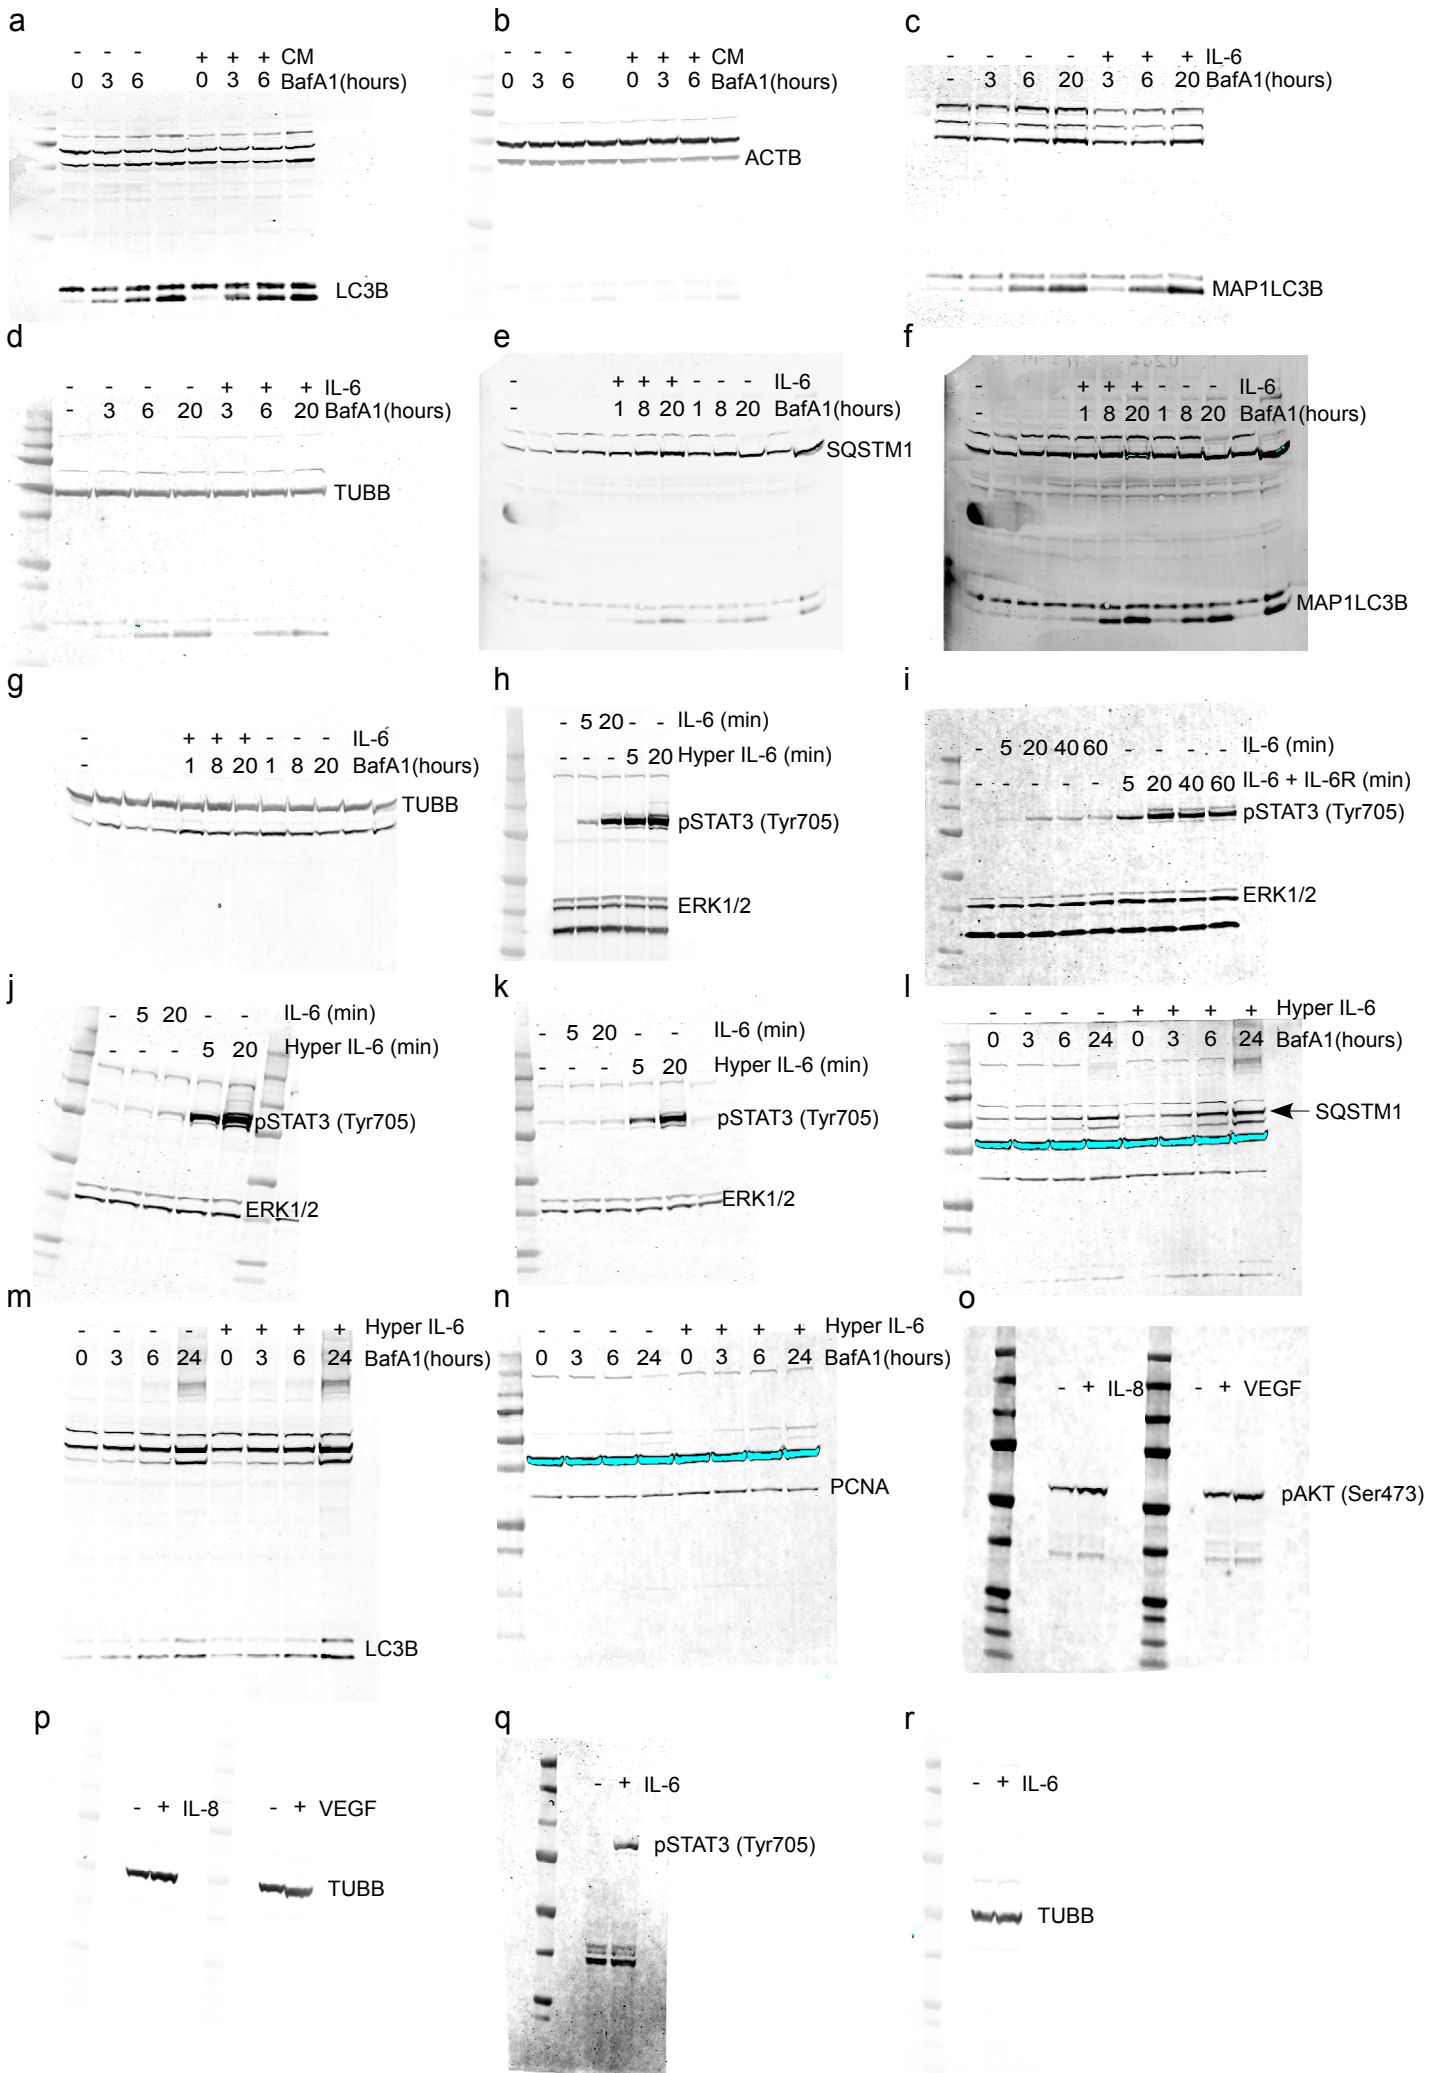

**Figure S4. Uncropped version of immunoblots displayed in main figures and figure S1.**

Uncropped version of immunoblot displayed in main figure 2F (A-B), 3D (C-D), 3E (E-G), 5A (H), 5C (I), 5E (J), 5F (K), 5G (L-N), figure S1A and C (O-P) and figure S1B (Q-R).

**Table S1. Cytokine, chemokine and growth factor levels (pg/ml) in conditioned medium from TOV21G cells following 1 and 3 days of cultivation. OOR= Out of range.**

| <b>Factor</b> | <b>Control</b> | <b>1 day</b> | <b>3 days</b> |
|---------------|----------------|--------------|---------------|
| IL-1beta      | OOR <          | OOR <        | 0.61          |
| IL-1ra        | 3.70           | 15.10        | 62.49         |
| IL-2          | OOR <          | 0.63         | 3.12          |
| IL-4          | OOR <          | 0.26         | 0.88          |
| IL-5          | OOR <          | OOR <        | 1.14          |
| IL-6          | OOR <          | 1475.64      | 7158.93       |
| IL-7          | OOR <          | 2.08         | 7.42          |
| IL-8          | OOR <          | 509.21       | 1909.53       |
| IL-9          | OOR <          | 2.08         | 9.54          |
| IL-10         | OOR <          | 2.78         | 10.65         |
| IL-12 (p70)   | OOR <          | 13.24        | 80.65         |
| IL-13         | OOR <          | 1.44         | 5.80          |
| IL-15         | OOR <          | OOR <        | OOR <         |
| IL-17         | OOR <          | 3.11         | 9.38          |
| Eotaxin       | OOR <          | 3.13         | 18.22         |
| Basic FGF     | OOR <          | 4.07         | 7.99          |
| G-CSF         | OOR <          | 2.12         | 12.87         |
| GM-CSF        | 17.29          | 17.2         | 24.01         |
| IFN-gamma     | OOR <          | 13.24        | 45.63         |
| IP-10         | OOR <          | 10.67        | 19.61         |
| MCP-1 (MCAF)  | OOR <          | 12.39        | 68.42         |
| MIP-1alfa     | OOR <          | 0.74         | 1.53          |
| MIP-1beta     | OOR <          | OOR <        | 1.01          |
| PDGF-BB       | 0.50           | 8.53         | 27.32         |
| RANTES        | OOR <          | 1.79         | 5.75          |
| TNF-alfa      | OOR <          | 6.33         | 20.99         |
| VEGF          | OOR <          | 99.89        | 546.07        |

**Table S2. Fiber cross section area of tibialis muscle in tumor-bearing mice.** Tibialis muscle cross section area of Fast Twitch (FT) Ila, b and non FT fibers in control, G-361 and A2058 tumor-bearing mice. Values as mean  $\pm$ SEM. \* $p < 0.05$ , \*\* $p < 0.01$  versus no tumor (Student t-test for G-361, Dunnett's multiple comparisons test following ANOVA for A2058).

| Fiber cross section area ( $\mu\text{m}^2$ ) | All fibers      | Ila            | Ilb            | Non-Ila/b        |
|----------------------------------------------|-----------------|----------------|----------------|------------------|
| No tumor (n=5)                               | 2216 $\pm$ 123  | 1523 $\pm$ 138 | 2602 $\pm$ 246 | 2381 $\pm$ 224   |
| G-361 (n=5)                                  | 2206 $\pm$ 71   | 1630 $\pm$ 68  | 2590 $\pm$ 194 | 2454 $\pm$ 145   |
| No tumor (n=3)                               | 2339 $\pm$ 190  | 1622 $\pm$ 123 | 2794 $\pm$ 289 | 2778 $\pm$ 248   |
| A2058 (n=4)                                  | 1754* $\pm$ 119 | 1172* $\pm$ 80 | 2249 $\pm$ 94  | 1705** $\pm$ 286 |

**Table S3. IL-6 level in sera from lung cancer patient.** Level of IL-6 in sera from patients with lung cancer (Norwegian lung cancer biobank) measured using an ELISA assay.

| Patient | IL-6 (pg/ml) | SD   | Patient | IL-6 (pg/ml) | SD   |
|---------|--------------|------|---------|--------------|------|
| 1       | 5,77         | 0,41 | 23      | 1,52         | 0,19 |
| 2       | 2,53         | 0,25 | 24      | 11,31        | 1,11 |
| 3       | 3,14         | 0,11 | 25      | 1,4          | 0,29 |
| 4       | 4,16         | 0,26 | 26      | 1,17         | 0,06 |
| 5       | 3,93         | 0,63 | 27      | 4,16         | 0,26 |
| 6       | 25,67        | 1,52 | 28      | 4,98         | 0,11 |
| 7       | 2,75         | 0,3  | 29      | 0,66         | 0,16 |
| 8       | 5,34         | 0,45 | 30      | 6,23         | 0,34 |
| 9       | 0,19         | 0    | 31      | 1,52         | 0,35 |
| 10      | 1,01         | 0,11 | 32      | 10,61        | 0,21 |
| 11      | 29,33        | 0,32 | 33      | 8,23         | 0,53 |
| 12      | 1,98         | 0,11 | 34      | 5,31         | 0,11 |
| 13      | 10,61        | 1,03 | 35      | 2,53         | 0,44 |
| 14      | 3,7          | 0,15 | 36      | 1,2          | 0,11 |
| 15      | 4,29         | 0,58 | 37      | 6,17         | 0,5  |
| 16      | 1,85         | 0,31 | 38      | 1,98         | 0,49 |
| 17      | 16,98        | 0,95 | 39      | 1,27         | 0,29 |
| 18      | 4,49         | 0,32 | 40      | 6,14         | 0,1  |
| 19      | 1,91         | 0    | 41      | 6,3          | 0,8  |
| 20      | 8,36         | 0,64 | 42      | 1,78         | 0,11 |
| 21      | 2,43         | 0,11 | 43      | 4,12         | 0,23 |
| 22      | 2,11         | 0,27 | 44      | 0,63         | 0,11 |

**Table S4. Cancer type in patients from the Human Pharmacogenetic Opioid Study (EPOS) included in this work.**

| <b>Cancer type</b>                       | <b>%</b> |
|------------------------------------------|----------|
| urological                               | 13.3     |
| hematological                            | 12       |
| prostate                                 | 12       |
| pancreatic                               | 6.7      |
| gastrointestinal                         | 18.7     |
| lung                                     | 13.3     |
| mesothelial                              | 2.7      |
| liver                                    | 1.3      |
| thyroidea                                | 2.7      |
| breast                                   | 6.7      |
| melanoma                                 | 2.7      |
| sarcoma                                  | 1.3      |
| cancer affecting the reproductive organs | 1.3      |
| primary tumor of unknown origin          | 5.3      |

**Table S5. Weight loss of patients from the Norwegian lung cancer biobank, the Edinburgh Cancer Cachexia Cohort (ECCC) Study, and the Human Pharmacogenetic Opioid Study (EPOS), that provided blood samples for the present study.**

| <b>Weight loss</b> | <b>Lung cancer biobank (n=76)<sup>a</sup></b> | <b>ECCC (n=127)<sup>b</sup></b> | <b>EPOS (n=75)<sup>b</sup></b> |
|--------------------|-----------------------------------------------|---------------------------------|--------------------------------|
| <b>&lt;0%</b>      | 51% (n=39)                                    | 15.7% (n=20)                    | 37.3% (n=28)                   |
| <b>0-5%</b>        | 15.8% (n=12)                                  | 29.2% (n=37)                    | 16% (n=12)                     |
| <b>5-10%</b>       | 19.7% (n=15)                                  | 21.2% (n=27)                    | 16% (n=12)                     |
| <b>&gt;10%</b>     | 13.2% (n=10)                                  | 33.9% (n=43)                    | 30.7% (n=23)                   |

<sup>a</sup> 3 months weight loss

<sup>b</sup> 6 months weight loss

## REFERENCES

- 1 Jostock, T. *et al.* Soluble gp130 is the natural inhibitor of soluble interleukin-6 receptor transsignaling responses. *European journal of biochemistry / FEBS* **268**, 160-167 (2001).
- 2 Fischer, M. *et al.* I. A bioactive designer cytokine for human hematopoietic progenitor cell expansion. *Nature biotechnology* **15**, 142-145, doi:10.1038/nbt0297-142 (1997).
- 3 Szasz, A. M. *et al.* Cross-validation of survival associated biomarkers in gastric cancer using transcriptomic data of 1,065 patients. *Oncotarget*, doi:10.18632/oncotarget.10337 (2016).
- 4 Gyorffy, B., Surowiak, P., Budczies, J. & Lanczky, A. Online survival analysis software to assess the prognostic value of biomarkers using transcriptomic data in non-small-cell lung cancer. *PLoS one* **8**, e82241, doi:10.1371/journal.pone.0082241 (2013).
